# Supplementary material
Source: Royal Society of Chemistry journal article supplement (doi:10.1039/d6ta00917d)
Supplement: d6ta00917d1.pdf [file d6ta00917d1.pdf]

## Supplementary information

### **C as a bridge and Bi as a photothermal converter to trigger visible-light catalytic CO<sub>2</sub> reduction over BiOBr by in situ solid-state reduction**

Zhihao Xing, Jing Xie\*, Zhende Wu, Jindou Hu, Zhenjiang Lu, Xiaoqing Xue, Faxiu Zhang, Yali

Cao\*

*State Key Laboratory of Chemistry and Utilization of Carbon Based Energy Resources, College of Chemistry, Xinjiang University, Urumqi, 830046, Xinjiang, PR China.*

\*Corresponding author. Email: caoyali523@163.com (Y. Cao); xiejing@xju.edu.cn (J. Xie).

## Supplementary Figures

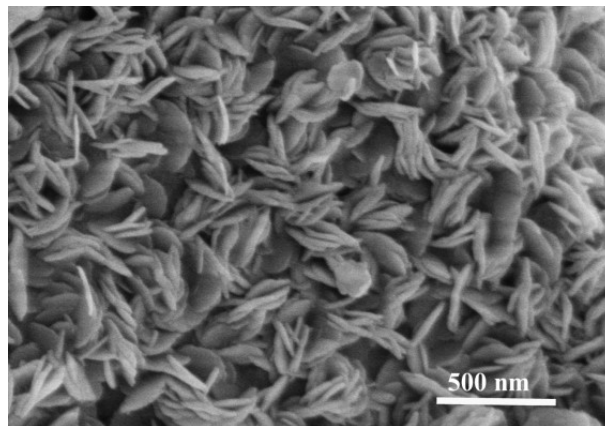

**Fig. S1** SEM of the precursor of BOB-20.

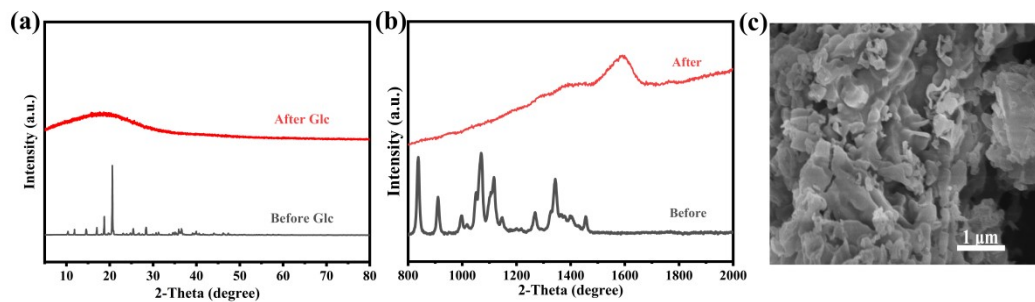

**Fig. S2** (a) XRD, (b) Raman and (c) SEM of Glc after holding at 320 °C under argon atmosphere for 4 h.

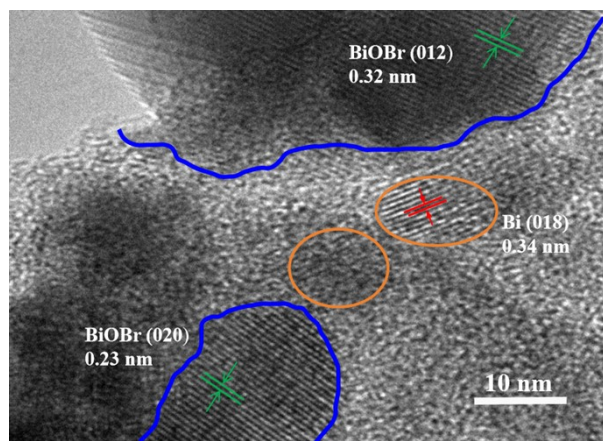

**Fig. S3** HRTEM of BOB-20.

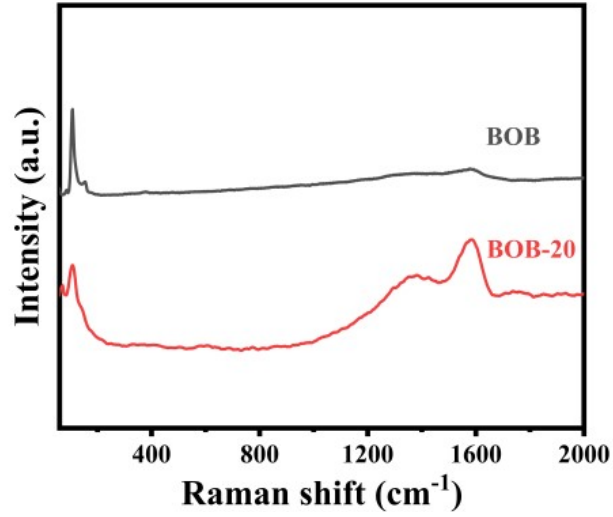

Fig. S4 Raman spectra of BOB and BOB-20.

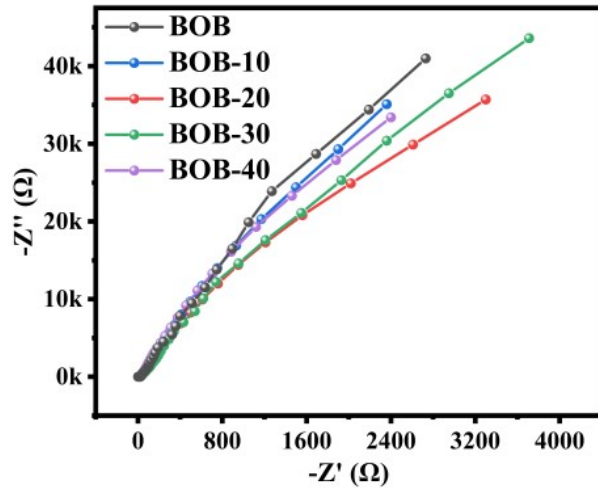

Fig. S5 EIS spectra of BOB and BOB-20.

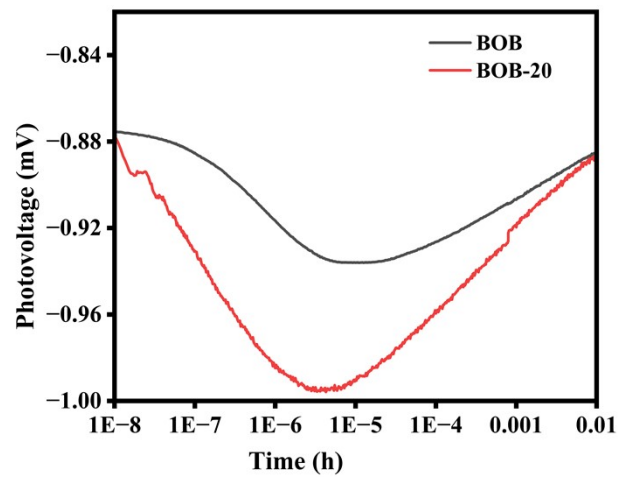

Fig. S6 TPV decay curves of BOB and BOB-20.

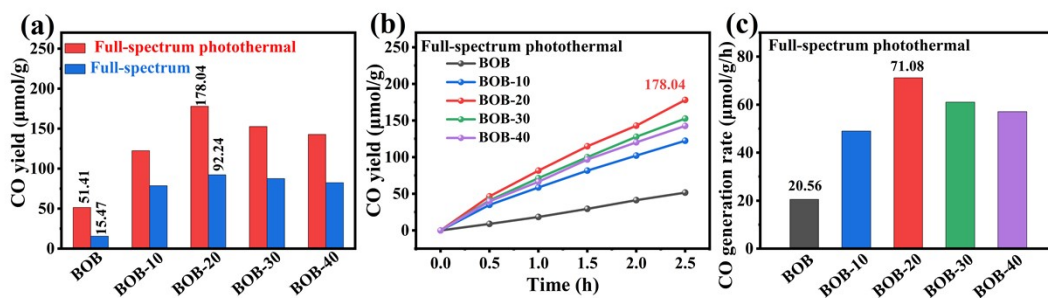

**Fig. S7** (a) Production diagrams of CO by photothermal and photocatalytic reduction of CO<sub>2</sub> under full-spectrum illumination, (b-c) Line chart and bar chart of full-spectrum photothermal performance over BOB and BOB-x.

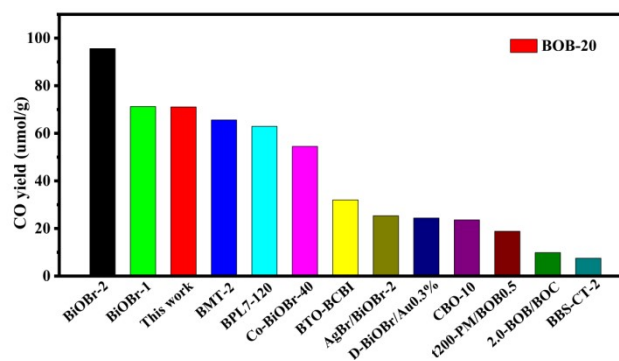

**Fig. S8** Comparison of photocatalytic activity between BiOBr and recently reported catalysts for CO<sub>2</sub> reduction [1-12].

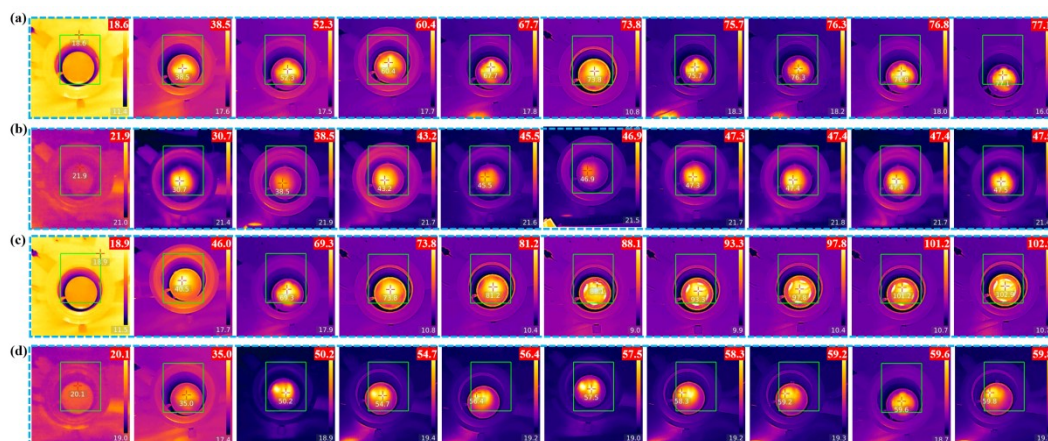

**Fig. S9** Thermal images of (a, c) BOB-20 and (b, d) BOB after 3 min of visible-light and full-spectrum irradiation, respectively (image interval: 20 s).

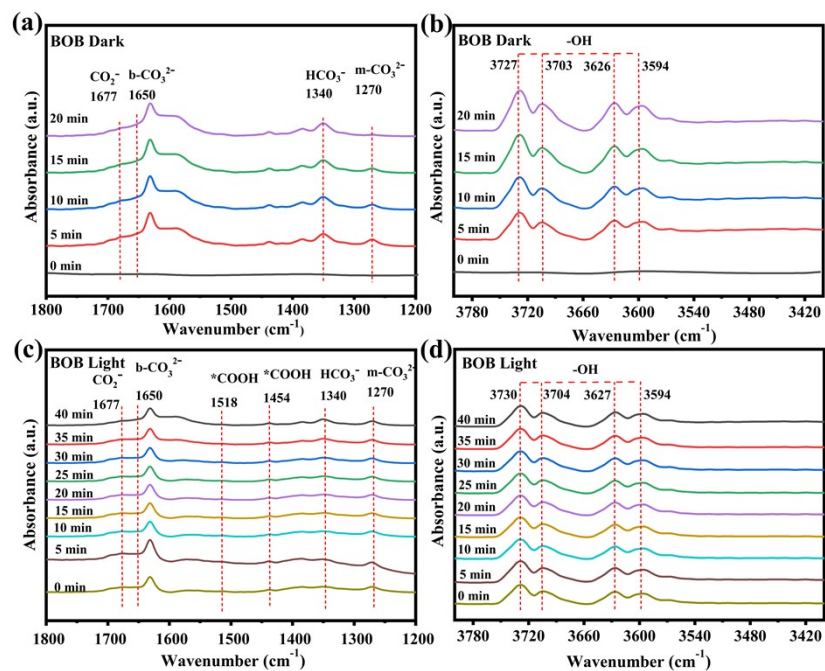

**Fig. S10** In situ- FT-IR spectra of the reaction of CO<sub>2</sub> and H<sub>2</sub>O from 1200 to 2000 cm<sup>-1</sup> (a, c) and 3400 to 3800 cm<sup>-1</sup> (b, d) on BOB.

**Table S1** XPS peak areas and the corresponding ratios of O<sub>V</sub> to O<sub>L</sub> for BOB and BOB-20.

|        | O <sub>V</sub> | O <sub>L</sub> | O <sub>V</sub> /O <sub>L</sub> |
|--------|----------------|----------------|--------------------------------|
| BOB    | 50595.02       | 97155.53       | 0.52                           |
| BOB-20 | 20658.39       | 27122.94       | 0.76                           |

**Table S2** Fitting Parameters and Average Lifetimes of TRPL Spectra.

|        | τ <sub>1</sub> (ns) | B <sub>1</sub> | τ <sub>2</sub> (ns) | B <sub>2</sub> | τ <sub>3</sub> (ns) | B <sub>3</sub> | τ <sub>avg</sub> (ns) |
|--------|---------------------|----------------|---------------------|----------------|---------------------|----------------|-----------------------|
| BOB    | 0.74                | 416.90         | 4.56                | 40.03          | 40.00               | 5.55           | 13.93                 |
| BOB-20 | 0.81                | 58.94          | 3.44                | 23.19          | 31.01               | 2.98           | 14.46                 |

## References

- [1] M. Fang, N. Li, Y. Han, H. Gao, F. Li, J. Wang, J. Wang, Y. Xiang, L. Zhang and D. Wang, *Chem. Eng. J.*, 2025, **523**, 169525.
- [2] J. Xie, Z. Lu, Y. Feng, J. Huang, J. Hu, A. Hao and Y. Cao, *Nano Res.*, 2024, **17**, 297-306.
- [3] M. Khan, Z. Akmal, M. Tayyab, S. Mansoor, D. Liu, Z. Ye, J. Zhang, S. Wu and L. Wang, *Appl. Catal. B Environ. Energy*, 2025, **370**, 125165.
- [4] Q. Yang, Q. Tian, X. Li, Y. Zhu and G. Fang, *Sep. Purif. Technol.*, 2024, **332**, 125775.
- [5] Y. Ma, X. Xu, T. Yang, Y. Shen, F. Jiang, Y. Zhang, X. Lv, Y. Liu, B. Feng, G. Che and L. Wang, *J. Alloys Compd.*, 2024, **970**, 172663.
- [6] L. Zhang, Y. Xuan, Q. Wang, D. Zhao and X. Liu, *Adv. Funct. Mater.*, 2025, e14966.
- [7] M. Shen, X. Cai, B. Cao, J. Cao, P. Zhao and Y. Xu, *J. Alloys Compd.*, 2024, **1009**, 176905.
- [8] Y. Lang, D. Hong, R. Ma, H. Zhang, L. Xu, X. Zhao, D. Wu, Y. Li, D. Zhou, Z. Song and Y. Wen, *J. Colloid Interface Sci.*, 2025, 138262.
- [9] K. Wang, R. J. You, H. Ma, T. Sun, Z. H. He, J. G. Chen, H. Wang, W. Wang, Y. Yang and Z. T. Liu, *J. Colloid Interface Sci.*, 2024, **654**, 988-1000.
- [10] Y. Shi, S. Liu, H. Chen, Z. Fu, Y. Li and S. Tang, *RSC Adv.*, 2025, **15**, 18000-18008.
- [11] Y. Li, L. Ai, R. Sheng, C. Tan, M. Zha, D. Jia, N. Guo and L. Wang, *J. Mol. Liq.*, 2024, **413**, 125960
- [12] J. Zhang, S. Wang, P. Song, A. Li, W. Jiang and J. Di, *J. Colloid Interface Sci.*, 2025, **679**, 383-390.
